# Supplementary material for: Collective cell migration and metastases induced by an epithelial-to-mesenchymal transition in Drosophila intestinal tumors
Source: PubMed Central journal article supplement (PMC6534551; doi:10.1038/s41467-019-10269-y), 2019-05-24
Supplement: 41467_2019_10269_MOESM1_ESM.pdf [file 41467_2019_10269_MOESM1_ESM.pdf]

## **Supplementary Information**

**Collective cell migration and metastases induced by an epithelial-to-mesenchymal transition in *Drosophila* intestinal tumors**

Campbell et al

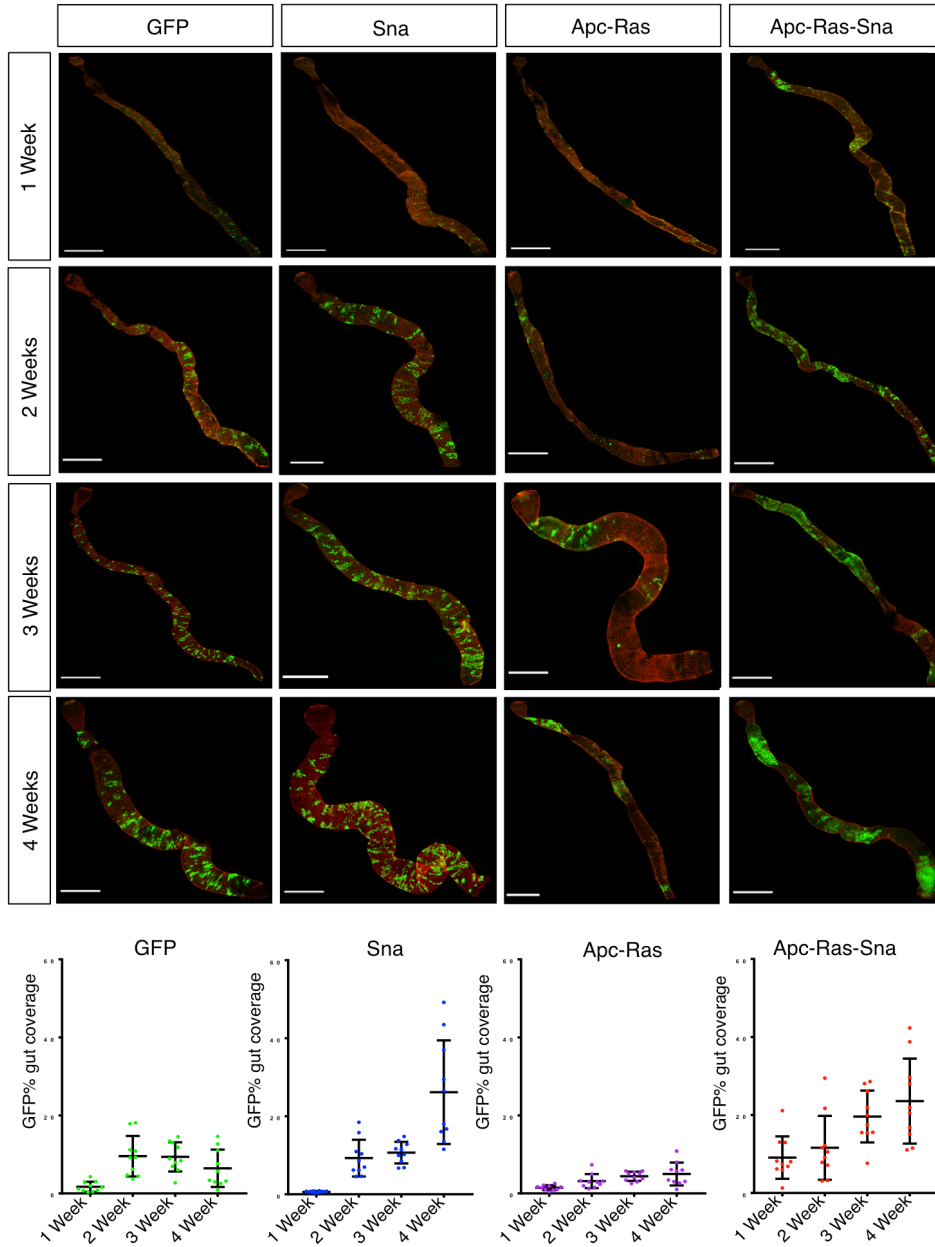

**Supplementary Figure 1: Tumor burden in the midgut of flies bearing Apc-Ras clones increases over time.** Midguts dissected from flies bearing GFP clones, Sna clones, Apc-Ras clones or Apc-Ras-Sna clones (GFP, green; Phalloidin, red) at 1 week, 2 weeks, 3 weeks and 4 weeks. Midgut clones in Apc-Ras and Apc-Ras-Sna increase in size over time, generating tumor-like overgrowths between 2-4 weeks after clone induction. GFP% whole-gut coverage was quantified per condition at 1 week, 2 weeks, 3 weeks and 4 weeks. n = 10 guts per time point. Error bars display standard deviation around the mean. Scale bars = 1000 $\mu$ m.

Apc-Ras-Sna TMet

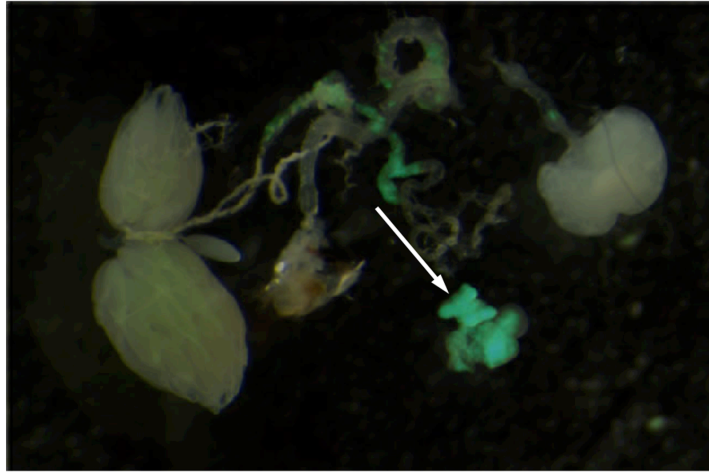

**Supplementary Figure 2: At T1 stage a piece of a dissected TMet (arrow) is implanted into the abdomen of a wild type host female fly.**

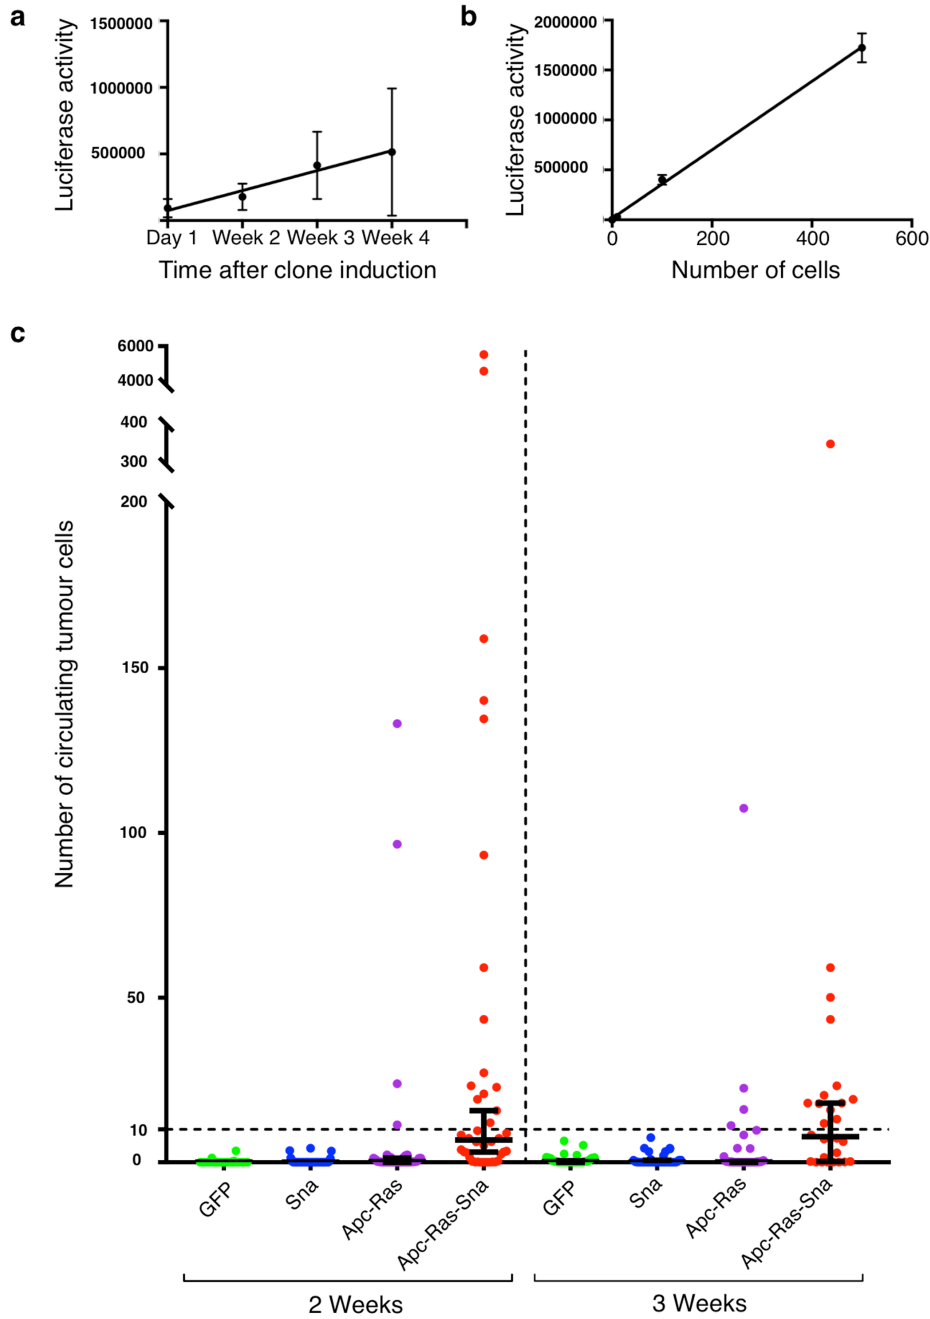

**Supplementary Figure 3: Luciferase activity can be used to assay for the presence of tumor cells with a sensitivity of down to 10 cells.**

(a) Lysates were prepared from adult flies and tested for luciferase activity. Error bars represent standard deviation (b) *Drosophila* midguts were dissected from Apc-Ras-Sna flies four weeks after induction. In order to obtain single cell suspensions, samples were incubated in PBS containing 0,4mg/ml dispase (Gibco) for 15 min at 37°C, syringed

using a 27G needle and washed twice with PBS. After selecting for the viable population (propidium iodide negative), GFP<sup>+</sup> cells were isolated by fluorescence activated cell sorting (FACS) using a FACSAria 2.0 (BD Biosciences). GFP<sup>+</sup> cells were sorted into aliquots of 10, 100 and 500 cells and tested for luciferase activity. This experiment was done in triplicate Error bars represent standard deviation. A linear correlation ( $r=0.9994$ ,  $p=0.0006$ ) was observed between the number of cells isolated and the amount of luciferase activity detected. (c) The number of CTC's found in haemolymph extracted from individual flies from each condition at 2 weeks and 3 weeks after clone induction. At 2 weeks  $n = 34, 46, 36$  and  $40$  for GFP, Sna, Apc-Ras and Apc-Ras-Sna respectively. At 3 weeks  $n = 40, 34, 38$  and  $28$  for GFP, Sna, Apc-Ras and Apc-Ras-Sna respectively. The threshold of cells considered significant (10) is displayed by a dashed-line. Error bars display 95% confidence intervals around the median value.

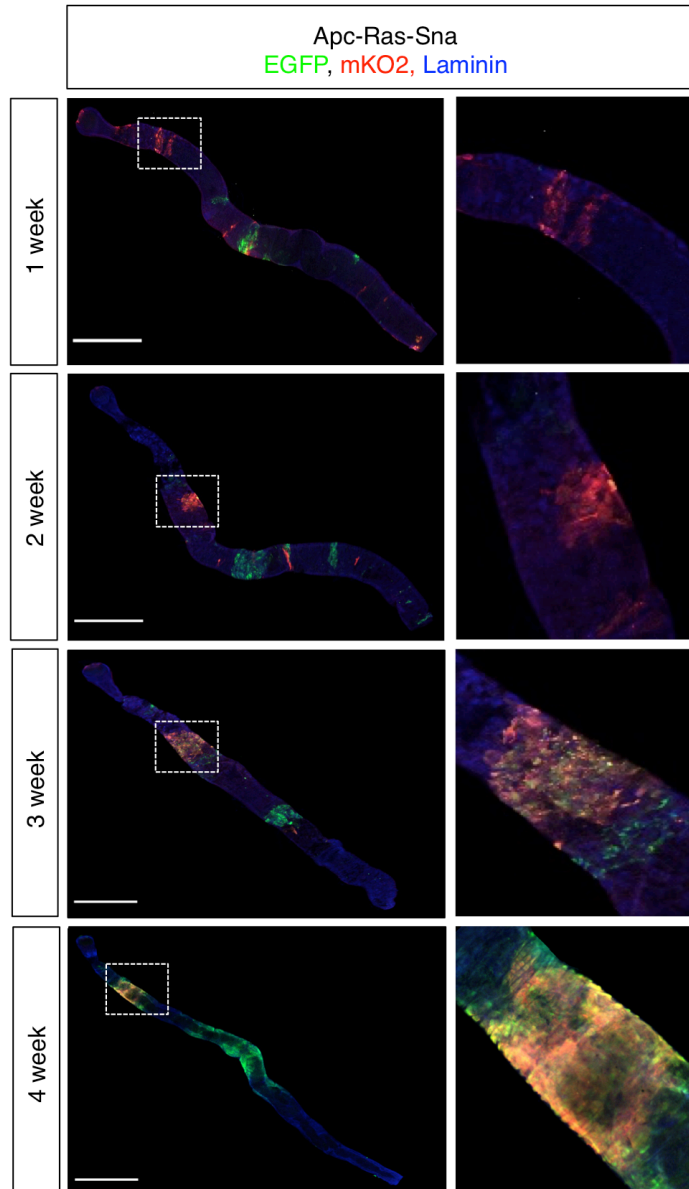

**Supplementary Figure 4: The dBrainbow reporter enables the tracing of clone behaviour over time.** Midguts dissected from flies bearing Apc-Ras-Sna clones and the dBrainbow reporter. Fixed midguts were stained for GFP (visualises EGFP, green), RFP (visualises mKO2, red) and Laminin (blue) and shown at 1 week, 2 weeks, 3 weeks and 4 weeks. The dashed box (left column) depicts the areas enlarged on the right. Scale bars = 1000 $\mu$ m.
